# Supplementary material for: Oral Function and Eating Habit Problems in People with Down Syndrome
Source: MDPI journal article supplement (doi:10.3390/ijerph19052616), 2022-02-24
Supplement: s1 [file s1]

**Suppl.Table S1.** OMES-E scores referred to facial segments in adults with Down syndrome.

|                                   | YAG  |      | OAG  |      | P-value |
|-----------------------------------|------|------|------|------|---------|
|                                   | Mean | SD   | Mean | SD   |         |
| Face                              |      |      |      |      |         |
| Facial symmetry                   | 2.88 | 0.84 | 2.70 | 0.68 | 0.629   |
| Proportion two-thirds of the face | 2.50 | 0.54 | 2.30 | 0.48 | 0.417   |
| Nasolabial folds                  | 2.13 | 0.35 | 2.00 | 0.47 | 0.543   |
| Total score out of 100            | 62.5 | 12.6 | 58.3 | 10.3 | 0.453   |
| Cheeks                            |      |      |      |      |         |
| Cheek volume                      | 3.13 | 0.84 | 3.10 | 0.57 | 0.941   |
| Cheek tone / configuration        | 2.50 | 1.07 | 2.00 | 0.00 | 0.155   |
| Total score out of 100            | 70.3 | 14.8 | 63.7 | 7.10 | 0.233   |
| Mandible / maxilla                |      |      |      |      |         |
| Mouth open > 4 mm                 | 2.75 | 0.46 | 2.50 | 0.71 | 0.402   |
| Anteroposterior relationship      | 2.88 | 1.13 | 1.80 | 0.63 | 0.021   |
| Midline relationship              | 2.38 | 0.52 | 2.60 | 0.70 | 0.460   |
| Total score out of 100            | 66.6 | 10.9 | 57.5 | 13.2 | 0.136   |
| Lips                              |      |      |      |      |         |
| Resting lip function              | 3.13 | 0.84 | 2.70 | 0.95 | 0.335   |
| Volume and configuration          | 2.25 | 0.46 | 2.50 | 0.53 | 0.307   |
| Lip commissures                   | 2.75 | 0.89 | 2.50 | 0.71 | 0.514   |
| Lower lip rhyming                 | 2.75 | 0.71 | 2.70 | 0.68 | 0.880   |
| Total score out of 100            | 66.6 | 10.9 | 57.5 | 13.2 | 0.136   |
| Chin muscle                       |      |      |      |      |         |
| Chin muscle                       | 3.25 | 0.89 | 2.50 | 1.18 | 0.155   |
| Total score out of 100            | 81.2 | 22.1 | 62.5 | 29.4 | 0.155   |
| Tongue                            |      |      |      |      |         |
| Position and appearance           | 2.5  | 0.9  | 2.2  | 0.6  | 0.426   |
| Appearance and volume             | 2.8  | 0.7  | 3.1  | 0.9  | 0.374   |
| Total score out of 100            | 65.6 | 12.9 | 66.3 | 15.6 | 0.929   |
| Palate                            |      |      |      |      |         |
| Width                             | 2.25 | 0.71 | 2.10 | 0.88 | 0.700   |
| Height                            | 2.00 | 0.76 | 1.90 | 0.74 | 0.781   |
| Total score out of 100            | 53.1 | 17.3 | 50.0 | 19.5 | 0.728   |

YAG: Younger adults' group; OAG: Older adults' group; Sd: standard deviation.
