# Supplementary material for: Oral Function and Eating Habit Problems in People with Down Syndrome
Source: MDPI journal article supplement (doi:10.3390/ijerph19052616), 2022-02-24
Supplement: s1 [file s1]

**Suppl. Table S2.** OMES-E scores referred to facial mobility in adults with Down syndrome.

|                                      | YAG         |                   | OAG         |                   | <i>P-value</i> |
|--------------------------------------|-------------|-------------------|-------------|-------------------|----------------|
|                                      | Mean        | SD                | Mean        | SD                |                |
| <b>Lip mobility</b>                  |             |                   |             |                   |                |
| Protrusion                           | 5.63        | 0.74              | 5.60        | 1.27              | 0.961          |
| Retrusion                            | 3.88        | 1.96              | 5.40        | 1.58              | 0.086          |
| Lateralization to right              | 1.75        | 1.39              | 2.20        | 1.81              | 0.571          |
| Lateralization to left               | 1.75        | 1.39              | 2.20        | 1.81              | 0.571          |
| <i>Total score out of 100</i>        | <i>54.1</i> | <i>16.5</i>       | <i>64.1</i> | <i>21.2</i>       | <i>0.292</i>   |
| <b>Tongue mobility</b>               |             |                   |             |                   |                |
| Protrusion                           | 6.0         | 0.0               | 5.8         | 0.6               | 0.387          |
| Retrusion                            | 6.0         | 0.0               | 5.9         | 0.3               | 0.387          |
| Lateralization to right              | 6.0         | 0.0               | 5.7         | 0.7               | 0.229          |
| Lateralization to left               | 6.0         | 0.0               | 5.7         | 0.7               | 0.229          |
| Upwards                              | 4.5         | 1.8               | 5.9         | 0.3               | 0.025          |
| Downwards                            | 4.5         | 1.8               | 5.9         | 0.3               | 0.025          |
| <i>Total score out of 100</i>        | <i>91.7</i> | <i>9.8</i>        | <i>96.9</i> | <i>5.3</i>        | <i>0.164</i>   |
| <b>Cheek mobility</b>                |             |                   |             |                   |                |
| Insufflation                         | 1.5         | 1.1               | 2.0         | 2.1               | 0.551          |
| sucking                              | 3.0         | 2.3               | 3.6         | 2.3               | 0.589          |
| Retraction                           | 3.4         | 2.1               | 3.6         | 2.3               | 0.146          |
| Move air from one cheek to the other | 1.0         | 0.0               | 1.3         | 0.9               | 0.387          |
| <i>Total score out of 100</i>        | <i>37.0</i> | <i>18.3</i>       | <i>49.2</i> | <i>22.7</i>       | <i>0.237</i>   |
| <b>Mandibular mobility</b>           |             |                   |             |                   |                |
| Open                                 | 6.00        | .000 <sup>a</sup> | 6.00        | .000 <sup>a</sup> | -              |
| Close                                | 6.00        | 0.00              | 5.90        | 0.32              | 0.387          |
| Lateralization to right              | 2.25        | 1.75              | 3.90        | 2.18              | 0.102          |
| Lateralization to left               | 2.25        | 1.75              | 3.90        | 2.18              | 0.102          |
| Protrusion                           | 4.38        | 2.20              | 5.00        | 1.63              | 0.498          |
| <i>Total score out of 100</i>        | <i>69.5</i> | <i>15.16</i>      | <i>82.3</i> | <i>19.5</i>       | <i>0.149</i>   |
| <b>Breathing</b>                     |             |                   |             |                   |                |
| Breathing                            | 2.88        | 0.84              | 2.60        | 0.84              | 0.500          |
| <i>Total score out of 100</i>        | <i>71.8</i> | <i>20.8</i>       | <i>65.0</i> | <i>21.08</i>      | <i>0.500</i>   |

YAG: Younger adults' group; OAG: Older adults' group; Sd: standard deviation.
