# Supplementary material for: Oral Function and Eating Habit Problems in People with Down Syndrome
Source: MDPI journal article supplement (doi:10.3390/ijerph19052616), 2022-02-24
Supplement: s1 [file s1]

**Suppl. Table S3.** OMES-E scores referred to swallowing problems and chewing efficiency in Down syndrome.

|                                          | YAG  |      | OAG  |      | <i>P-value</i> |
|------------------------------------------|------|------|------|------|----------------|
|                                          | Mean | SD   | Mean | SD   |                |
| <b>Lip problems during swallowing</b>    |      |      |      |      |                |
| Lip sealing                              | 3.75 | 0.46 | 3.10 | 0.99 | 0.109          |
| <i>Total score out of 100</i>            | 62.5 | 7.71 | 51.6 | 16.5 | 0.109          |
| <b>Tongue problems during swallowing</b> |      |      |      |      |                |
| Contained within oral cavity             | 4.0  | 0.0  | 3.9  | 0.3  | 0.387          |
| Between the teeth                        | 3.0  | 0.0  | 2.9  | 0.3  | 0.387          |
| <i>Total score out of 100</i>            | 87.5 | 0.0  | 85.0 | 7.9  | 0.387          |
| <b>Problems during swallowing</b>        |      |      |      |      |                |
| Associated movements                     | 1.5  | 0.53 | 1.5  | 0.52 | 10.00          |
| Sliding of mandible                      | 1.38 | 0.51 | 1.2  | 0.42 | 0.440          |
| Facial muscle tension                    | 1.0  | 0.10 | 1.2  | 0.42 | 0.201          |
| Food leakage                             | 1.75 | 0.46 | 1.8  | 0.42 | 0.814          |
| Cough                                    | 2.00 | 0.00 | 2.00 | 0.00 | 10.00          |
| Noise                                    | 1.88 | 0.35 | 1.9  | 0.31 | 0.876          |
| <i>Total score out of 100</i>            | 79.1 | 6.29 | 80   | 9.78 | 0.838          |
| <b>Swallowing efficiency</b>             |      |      |      |      |                |
| Solids swallowing efficiency             | 1.63 | 0.52 | 1.30 | 0.48 | 0.188          |
| Liquids swallowing efficiency            | 2.63 | 0.52 | 2.90 | 0.32 | 0.183          |
| <i>Total score out of 100</i>            | 47.2 | 7.86 | 46.6 | 7.03 | 0.876          |
| <b>Chewing - bite</b>                    |      |      |      |      |                |
| First bite                               | 3.5  | 0.8  | 3.1  | 0.6  | 0.217          |
| <i>Total score out of 100</i>            | 87.5 | 18.9 | 77.5 | 14.2 | 0.217          |
| <b>Chewing</b>                           |      |      |      |      |                |
| Type of chewing                          | 5.25 | 1.04 | 5.00 | 1.05 | 0.621          |
| <i>Total score out of 100</i>            | 52.5 | 10.3 | 50.0 | 10.5 | 0.621          |
| <b>Problems during chewing</b>           |      |      |      |      |                |
| Associated movements                     | 1.38 | 0.52 | 1.40 | 0.52 | 0.920          |
| Postural changes                         | 1.63 | 0.52 | 1.70 | 0.48 | 0.755          |
| Food leakage                             | 1.38 | 0.52 | 1.50 | 0.71 | 0.682          |
| <i>Total score out of 100</i>            | 72.9 | 17.6 | 76.6 | 19.5 | 0.679          |

YAG: Younger adults' group; OAG: Older adults' group; Sd: standard deviation.
